# Supplementary material for: Association of Childhood Maltreatment With Interpersonal Distance and Social Touch Preferences in Adulthood
Source: Atypon-hosted journal article supplement (doi:10.1176/appi.ajp.2019.19020212), 2019-08-16
Supplement: appi.ajp.2019.19020212.ds001.pdf [file appi.ajp.2019.19020212.ds001.pdf]

 


Psychiatry Online
